# Supplementary material
Source: publisher site journal article supplement (https://www.dovepress.com/article/325495)
Supplement: Supplementary file 1 [file get_supplementary_file.php]

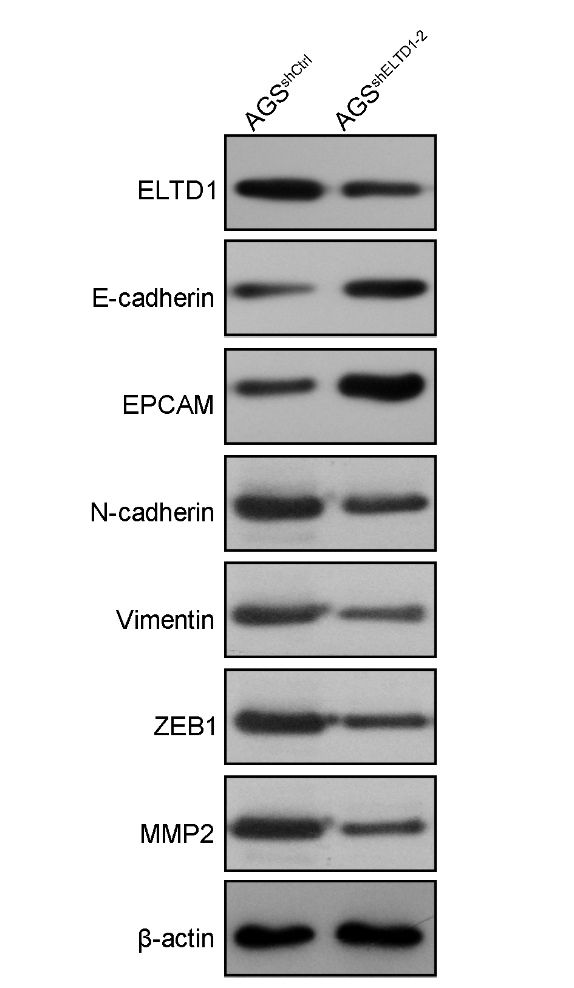


**Supplementary Fig. 1 Knockdown of ELTD1 inhibits EMT of GC Cells.** Western blot assay was used to detect the expression of EMT markers in AGSshELTD1-2 cells and its control cells.


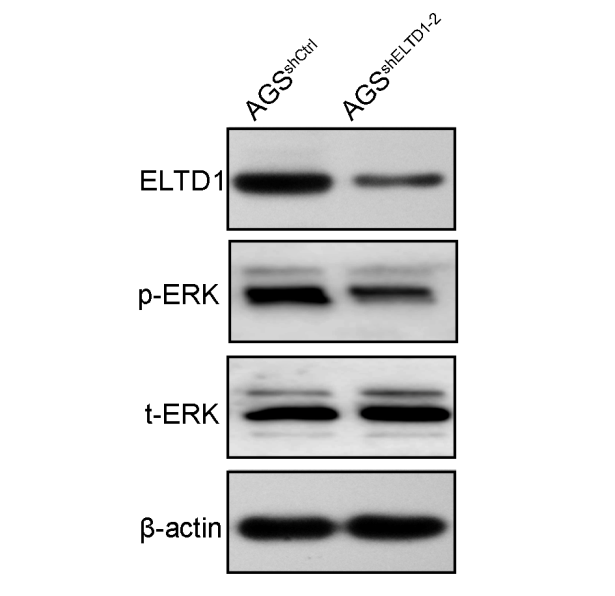


**Supplementary Fig. 2 Knockdown of ELTD1 inhibits ERK signaling in GC.** The levels of t-ERK and p-ERK were determined by western blot in AGSshELTD1-2 cells and its control cells.
